# Supplementary material for: The structural characterization and bioactivity assessment of nonspecific lipid transfer protein 1 (nsLTP1) from caraway (Carum carvi) seeds
Source: Springer Nature journal article supplement (doi:10.1186/s12906-023-04083-9), 2023-07-20

**The structural characterization and bioactivity assessment of nonspecific lipid transfer protein 1 (nsLTP1) from caraway (*Carum carvi*) seeds**

Taibah Aldakhil<sup>1,2</sup>, Saud O. Alshammari<sup>1,3</sup>, Bushra Siraj<sup>4</sup>, Bishoy El-Aarag<sup>1,5</sup>, Shamshad Zarina<sup>4</sup>, David Salehi<sup>1</sup>, Aftab Ahmed<sup>1,\*</sup>

<sup>1</sup> Biomedical and Pharmaceutical Sciences, Chapman University School of Pharmacy, Irvine, CA 92618, USA

<sup>2</sup> Department of Pharmaceutical Chemistry, College of Pharmacy, Prince Sattam Bin Abdulaziz University, Al-Kharj 16278, Saudi Arabia

<sup>3</sup> Department of Plant Chemistry and Natural Products, Faculty of Pharmacy, Northern Border University, Arar 91431, Saudi Arabia

4. Dr. Zafar H. Zaidi Center for Proteomics, University of Karachi, Karachi, Pakistan

5. Biochemistry Division, Chemistry Department, Faculty of Science, Menoufia University, Shebin El-Koom 32512, Egypt

\*Corresponding author

Aftab Ahmed  
Chapman University School of Pharmacy  
9401 Jeronimo Road  
Irvine, CA 92618  
USA  
Tel: (714) 516-5465  
Fax: (714) 516-5481  
[aahmed@chapman.edu](mailto:aahmed@chapman.edu)

**Supplementary Table S1:** Template sequences obtained by BLASTp results against PDB database.

| <b>S. No.</b> | <b>Organism Name</b>                             | <b>Total score</b> | <b>Query coverage</b> | <b>E-value</b> | <b>Percent Identity</b> | <b>Positives</b> | <b>PDB ID</b> |
|---------------|--------------------------------------------------|--------------------|-----------------------|----------------|-------------------------|------------------|---------------|
| 1.            | <i>Solanum melongena</i>                         | 100                | 97%                   | 6E-29          | 47.78                   | 67               | 5TVI_V        |
| 2.            | <i>Actinidia chinensis</i> var. <i>chinensis</i> | 100                | 97%                   | 7E-29          | 50.00                   | 68               | 7KSB_A        |
| 3.            | <i>Prunus persica</i>                            | 76.3               | 97%                   | 3E-19          | 40.00                   | 58               | 2ALG_A        |
| 4.            | <i>Lens culinaris</i>                            | 72.8               | 97%                   | 6E-18          | 42.22                   | 55               | 5LQV_A        |
| 5.            | <i>Lens culinaris</i>                            | 72.8               | 97%                   | 6E-18          | 42.22                   | 55               | 2MAL_A        |
| 6.            | <i>Corylus avellana</i>                          | 70.5               | 98%                   | 5E-17          | 38.46                   | 54               | 4XUW_A        |
| 7.            | <i>Oryza sativa</i>                              | 70.1               | 97%                   | 6E-17          | 37.78                   | 56               | 1BV2_A        |
| 8.            | <i>Zea mays</i>                                  | 70.1               | 97%                   | 8E-17          | 39.56                   | 58               | 1AFH_A        |
| 9.            | <i>Triticum aestivum</i>                         | 68.9               | 97%                   | 1E-16          | 35.56                   | 58               | 1BWO_A        |
| 10.           | <i>Artemisia vulgaris</i>                        | 65.9               | 97%                   | 3E-15          | 36.67                   | 53               | 6FRR_A        |
| 11.           | <i>Vigna radiata</i> var. <i>radiate</i>         | 65.5               | 97%                   | 4E-15          | 38.89                   | 53               | 1SIY_A        |
| 12.           | <i>Pisum sativum</i>                             | 63.5               | 97%                   | 3E-14          | 39.13                   | 56               | 2N81_A        |
| 13.           | <i>Hordeum vulgare</i>                           | 61.2               | 97%                   | 2E-13          | 31.11                   | 55               | 1BE2_A        |
| 14.           | <i>Punica granatum</i>                           | 59.7               | 97%                   | 8E-13          | 34.07                   | 54               | 7KSC_A        |
| 15.           | <i>Nicotiana tabacum</i>                         | 58.9               | 97%                   | 1E-12          | 36.67                   | 54               | 1T12_A        |
| 16.           | <i>Anethum graveolens</i>                        | 57.8               | 97%                   | 4E-12          | 36.56                   | 52               | 2N2Z_A        |

**Supplementary Table S2:** The molecular interactions found between caraway nsLTP1 and linolenic, linoleic, stearic and palmitic acids ligands.

| <b>COMPOUNDS</b> | <b>VINA SCORES</b> | <b>HYDROGEN BOND (Å)</b> | <b>HYDROPHOBIC INTERACTIONS</b>                 | <b>VAN DER WAALS INTERACTIONS</b>                           |
|------------------|--------------------|--------------------------|-------------------------------------------------|-------------------------------------------------------------|
| Linolenic acid   | -3.6<br>Kcal/mol   | Leu78 (2.1 Å)            | Pro71 (Alkyl)<br>Pro81 (Alkyl)                  | Ala67, Gln68,<br>Lys77, Ile82 and<br>Ser83                  |
| Linoleic acid    | -3.5<br>Kcal/mol   | Leu78 (2.8 Å)            | Pro71 (Alkyl)<br>Pro81 (Alkyl)<br>Ile91 (Alkyl) | Ala67, Gln68,<br>Asp79, Ile82, Ser83<br>and Thr86           |
| Stearic acid     | -3.4<br>Kcal/mol   | Thr86 (1.9 Å)            | Ala67 (Alkyl)<br>Pro71 (Alkyl)<br>Pro81 (Alkyl) | Asp64, Gln68,<br>Leu78, Ile82, Ser83<br>and Asn85           |
| Palmitic acid    | -3.0<br>Kcal/mol   | Leu78 (2.0 Å)            | Ala67 (Alkyl)<br>Pro71 (Alkyl)<br>Pro81 (Alkyl) | Asp64, Gln68,<br>Lys77, Ile82,<br>Ser83, Asn85 and<br>Thr86 |

**Supplementary Table S3:** Artificial fluids affect over caraway nsLTP1 secondary structure estimated by Principal Component Regression (PCR) analysis of CD spectra.

| Temperature     | $\alpha$ -helix | $\beta$ -sheet | Turn  | Other |
|-----------------|-----------------|----------------|-------|-------|
| Ultrapure Water | 32.4%           | 21.9%          | 11.2% | 34.5% |
| AIF*            | 46.4%           | 2.4%           | 15.3% | 35.9% |
| AGF*            | 37.3%           | 18.4%          | 13.0% | 31.3% |

\*Artificial Gastric (AGF) and Intestinal (AIF) Fluids.

**Supplementary Fig. S1.** The full-length electrophoretic profile by Tris/Tricine SDS-PAGE (10%) of caraway seeds proteins precipitates and gel filtration chromatography fractions. Lane M, standard molecular weight marker, Lane C, crude proteins, and Lane 1–8, eluted gel filtration fractions.

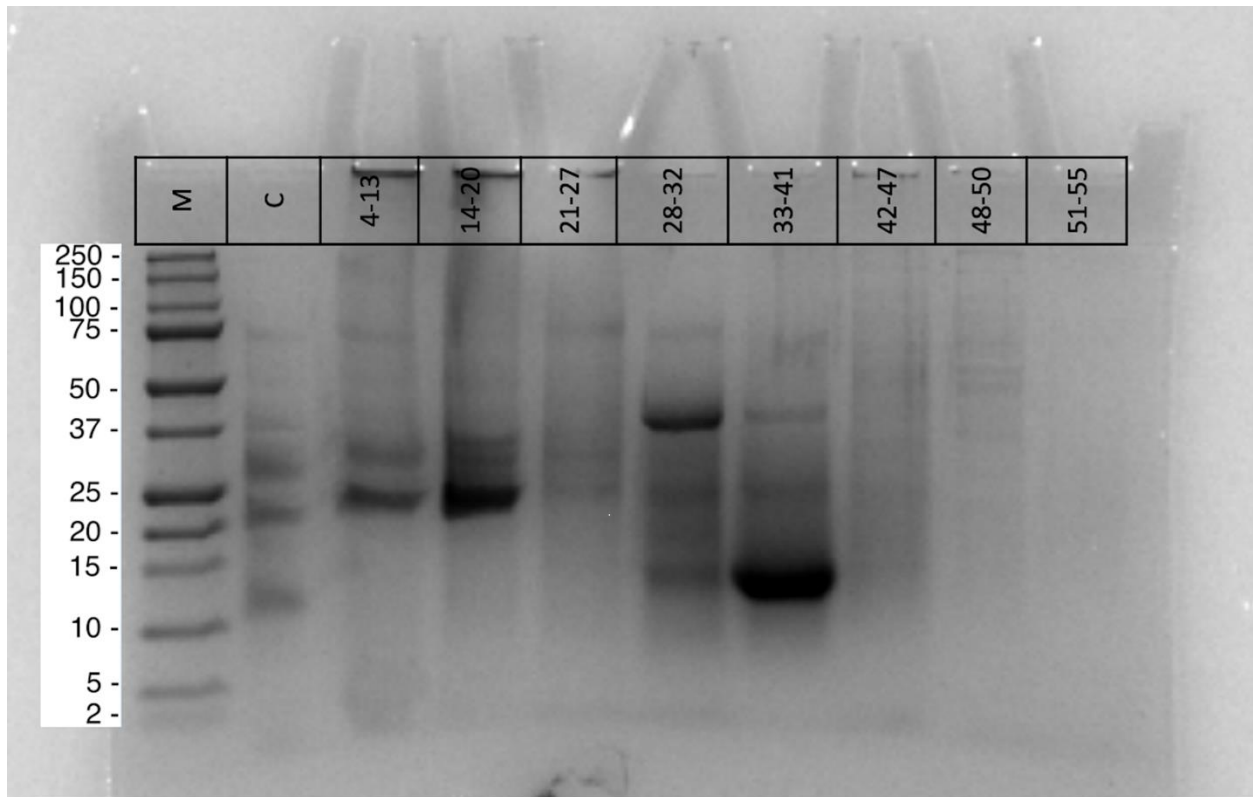

**Supplementary Fig. S2.** Ramachandran Plot of modeled structure of caraway nsLTP1. Most favored region contains more than 90% residues predicting a good quality model.

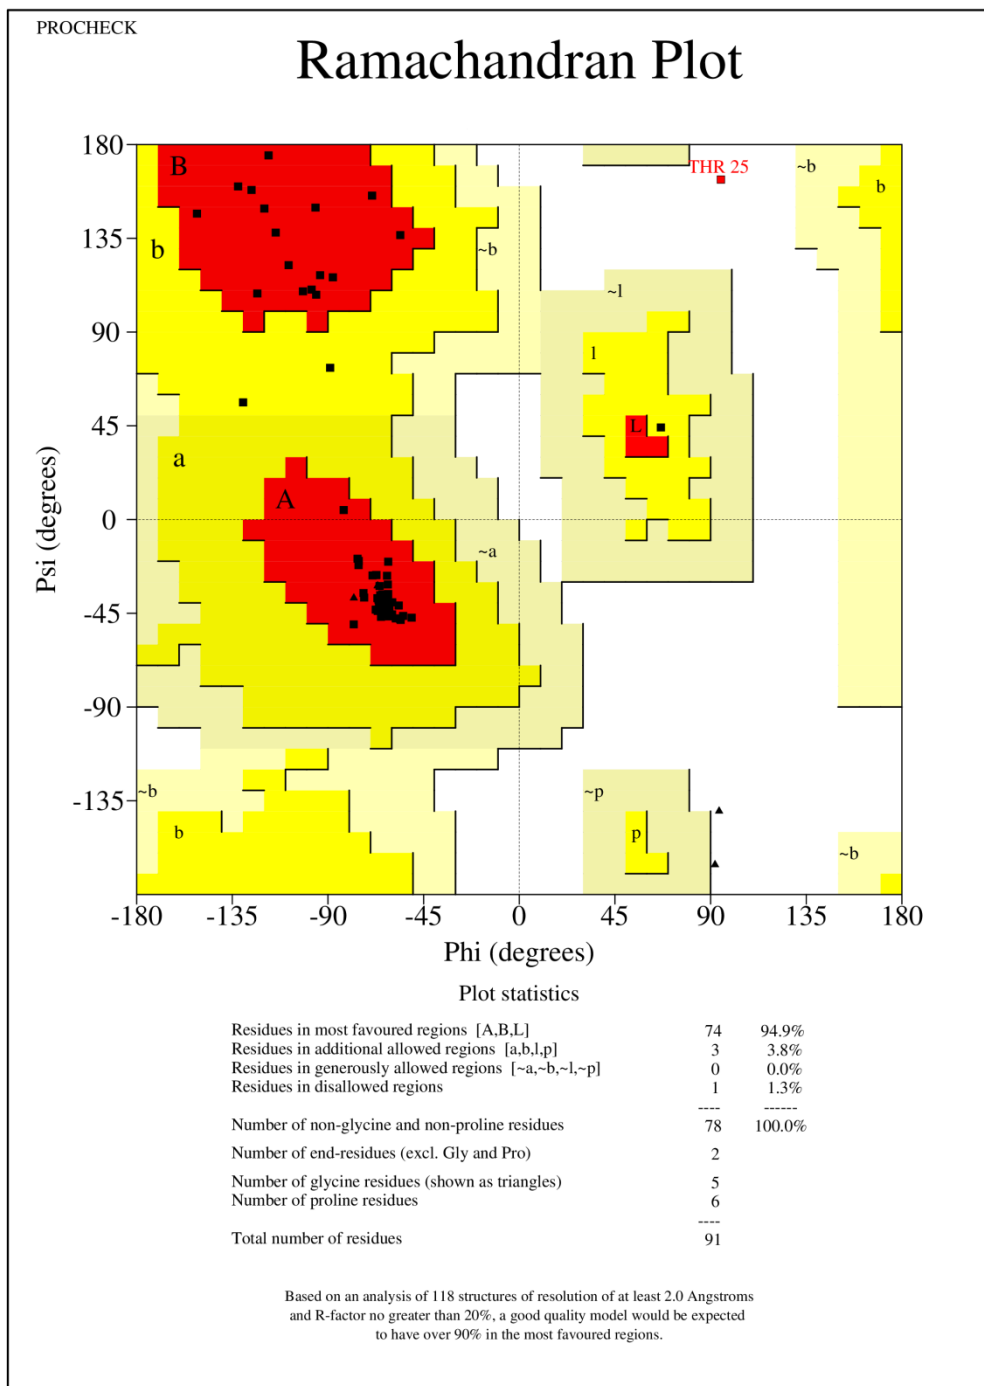

**Supplementary Fig. S3.** Validation of modeled caraway nsLTP1 structure through ProSA server. Z-score is -6.37 within the range of scores of experimentally determined structures.

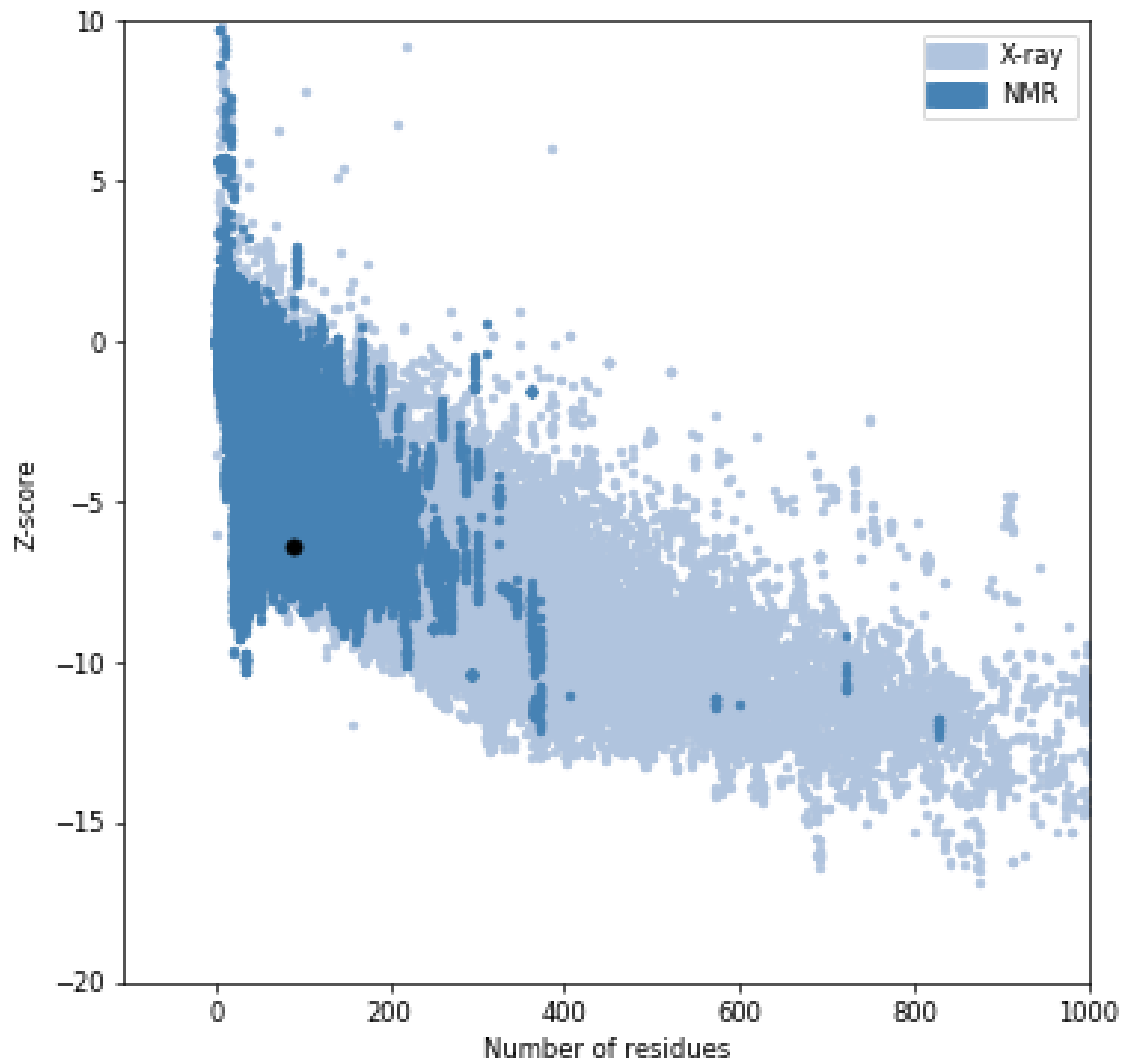

**Supplementary Fig. S4.** 2D interactions drawn from Discovery Studio of four fatty acids complexed with caraway nsLTP1 (a) linolenic acid (b) linoleic acid (c) stearic acid (d) palmitic acid are making hydrogen bond, van der waal interaction and alkyl (hydrophobic) interaction.

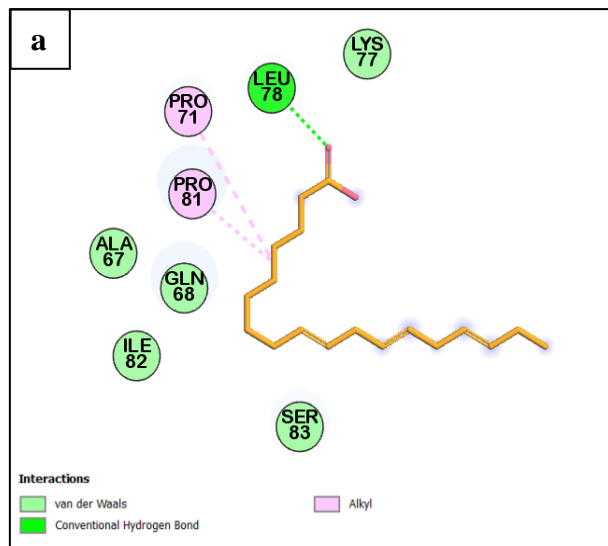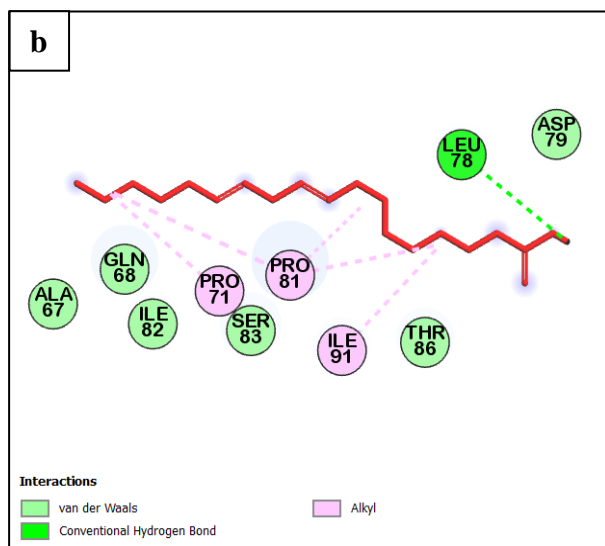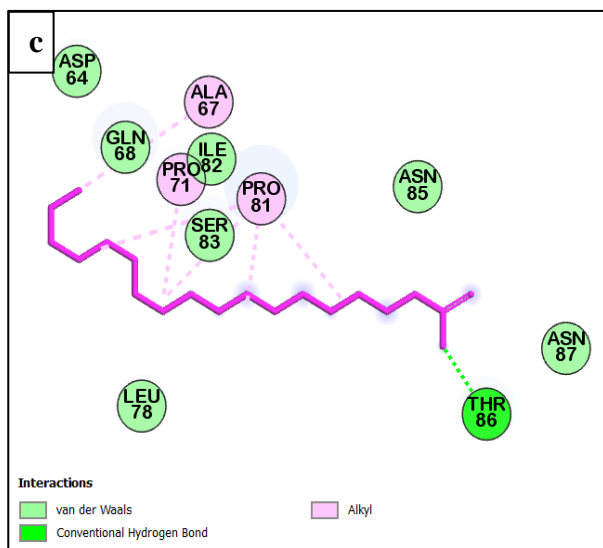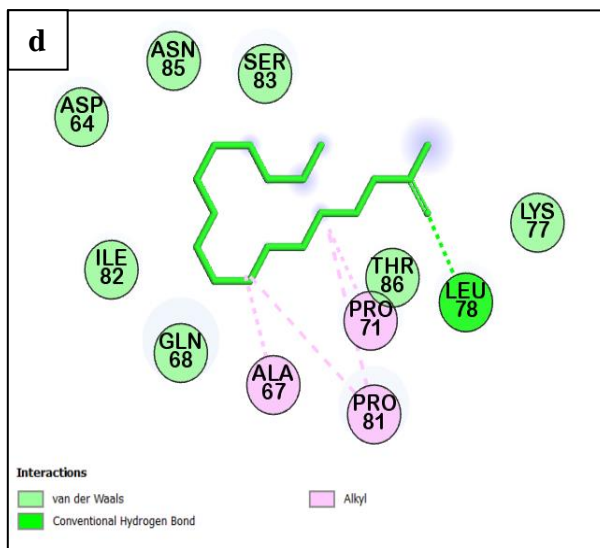



**Supplementary Fig. S5.** Stability of caraway nsLTP1 under different pH environments. Caraway nsLTP1 in ultrapure water, artificial gastric fluid pH 1.6, and artificial intestinal fluid pH 6.8 CD spectra were collected at 37 °C.

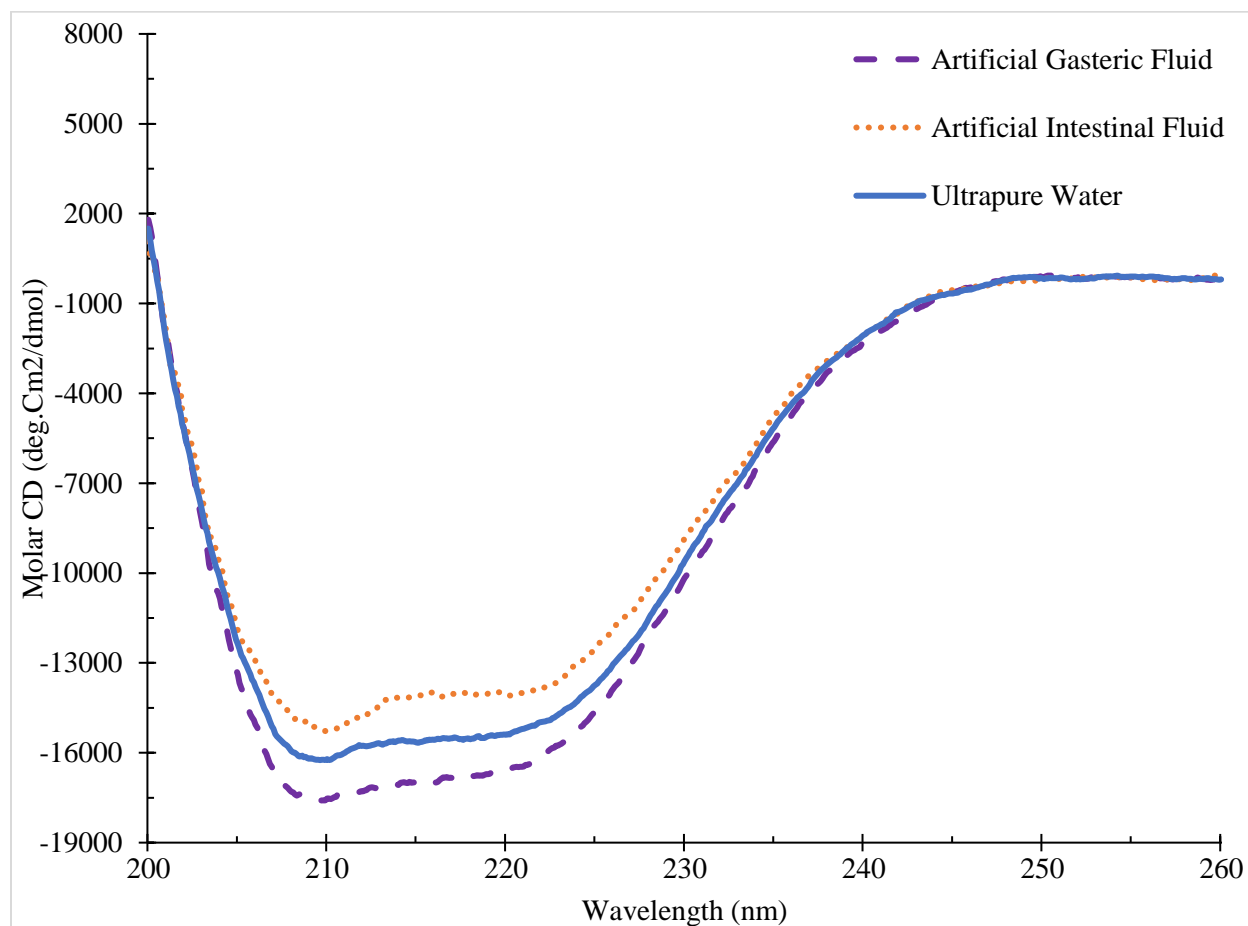

Supplement: MOESM1 [file 25826550]
